# Supplementary figures and images for: Length regulation of multiple flagella that self-assemble from a shared pool of components
Source: eLife journal article supplement (doi:10.7554/elife.42599), 2019-10-09

## Depolymerizer separate

## Depolymerizer shared

Tubulin  
separate

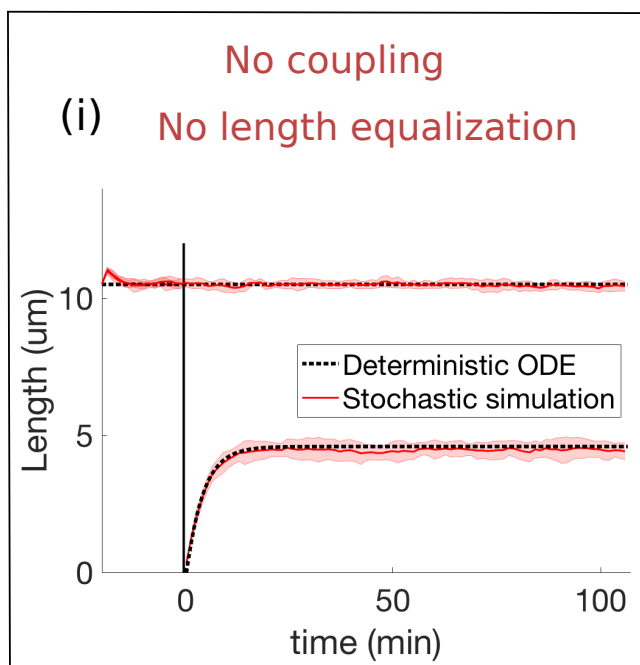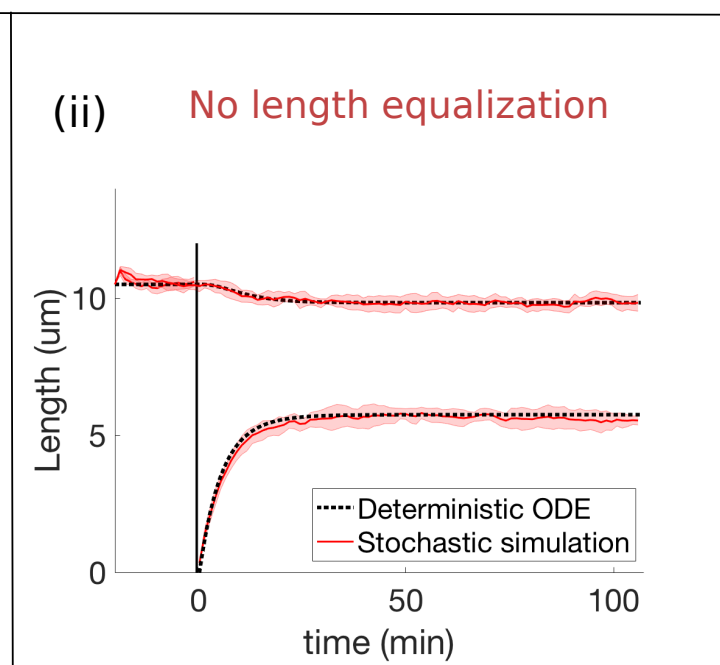

Tubulin  
shared

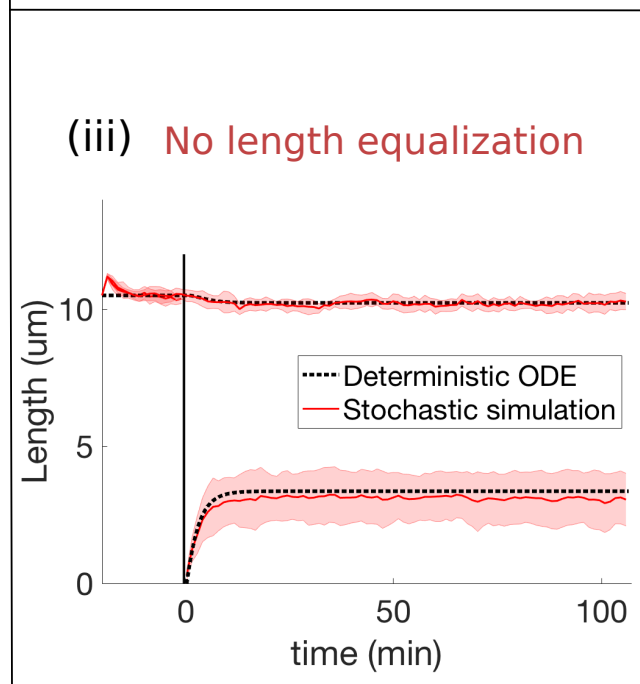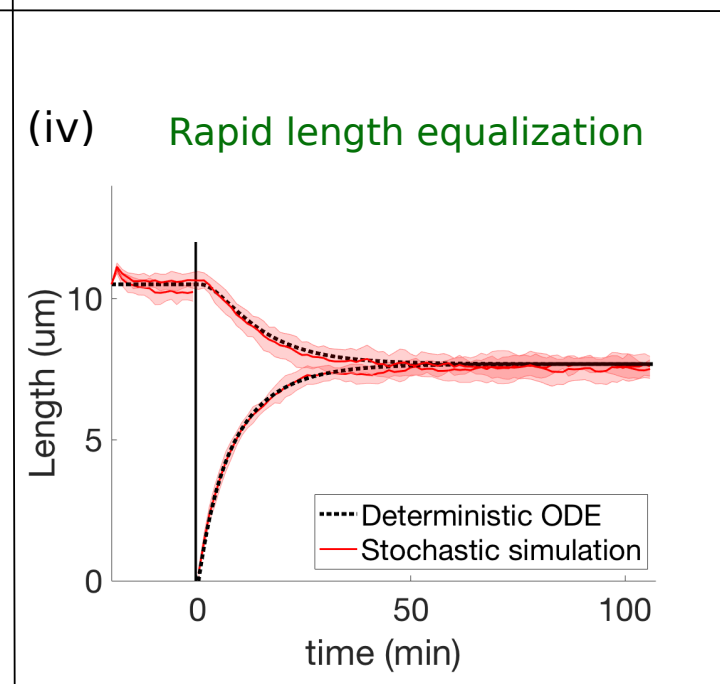

Supplement: supp [file elife-42599-supp-v1.zip]

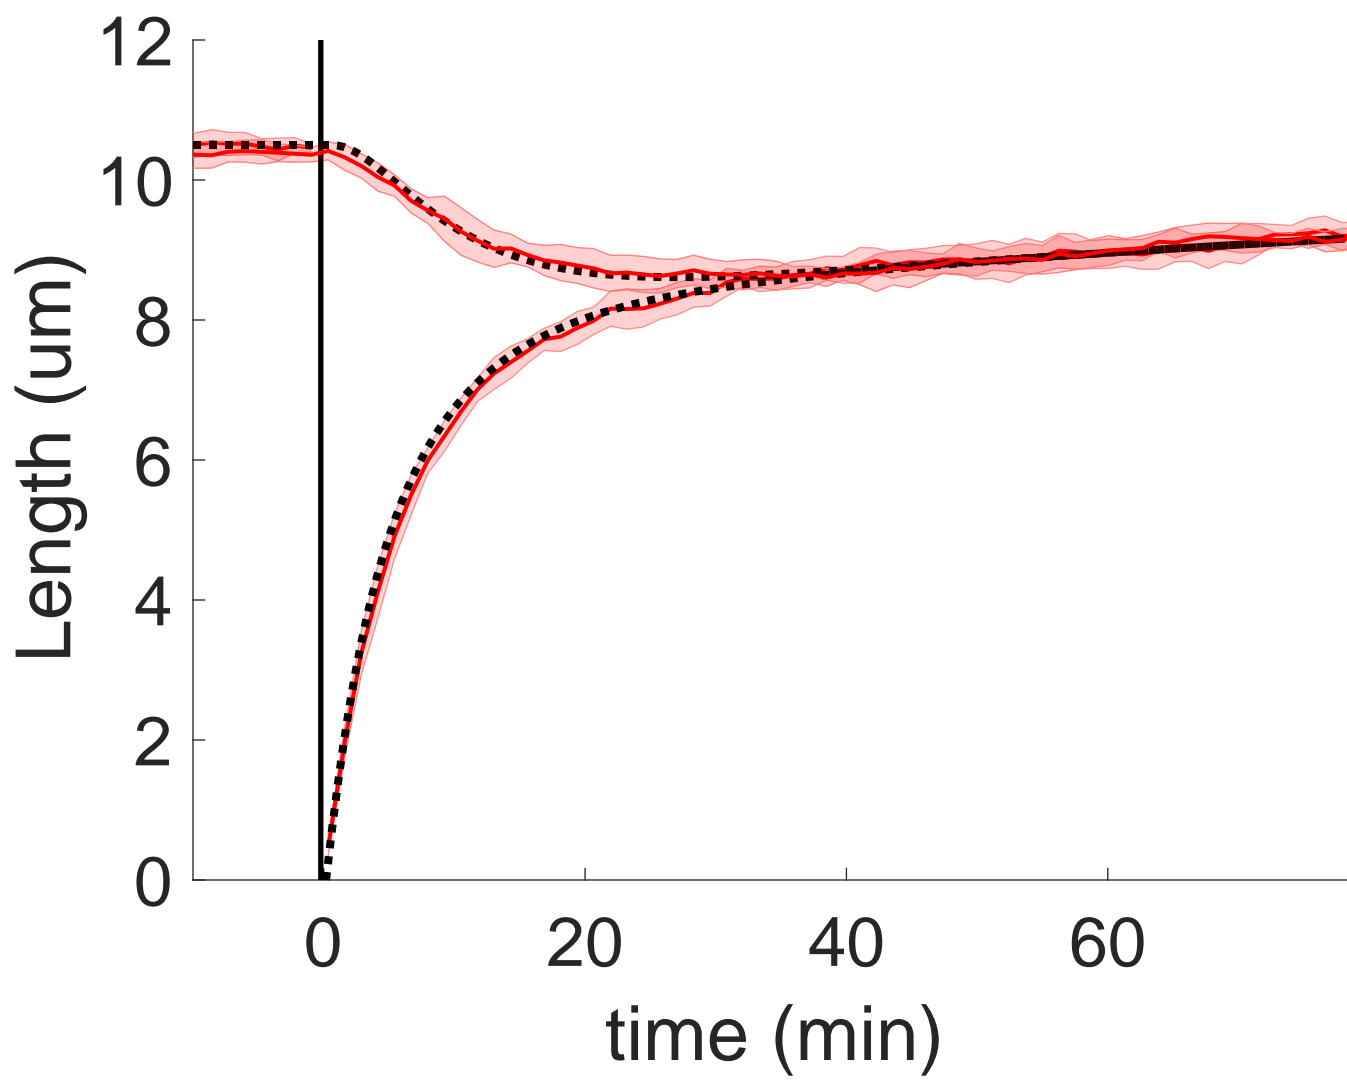

Supplement: supp [file elife-42599-supp-v1.zip]

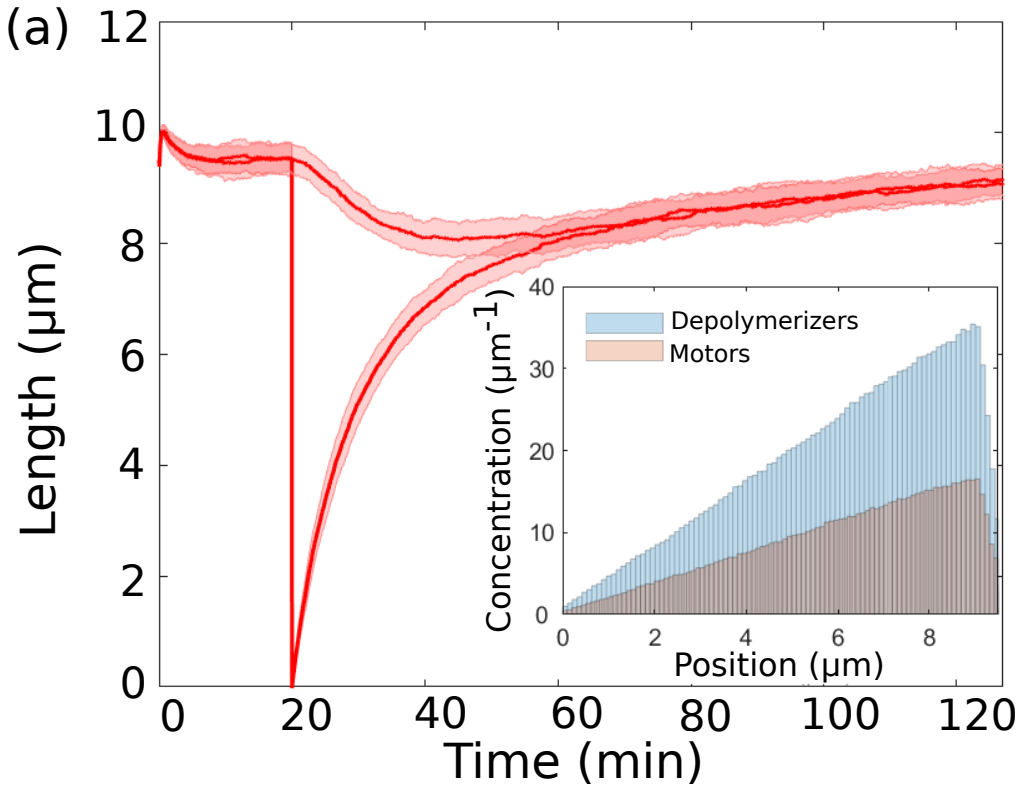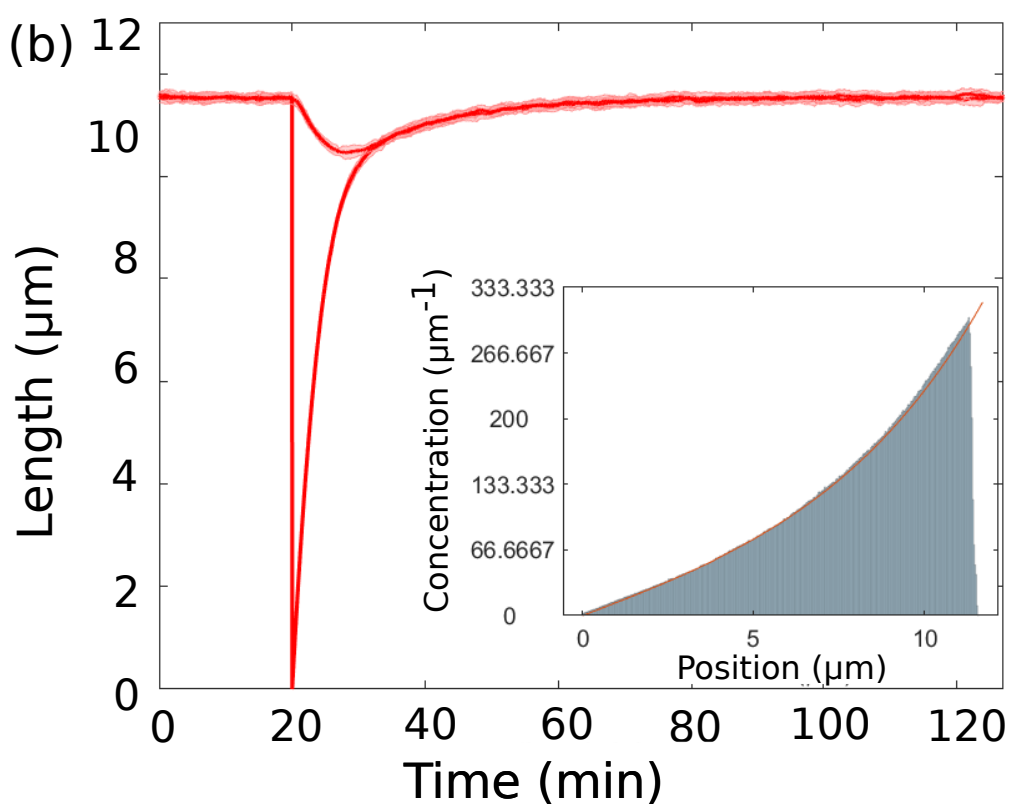

(c)

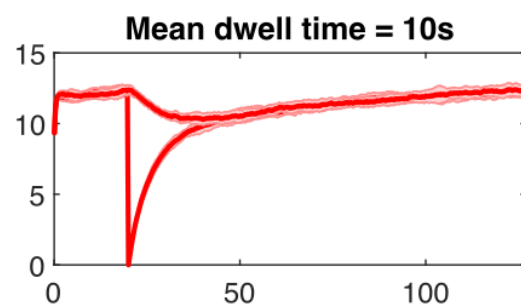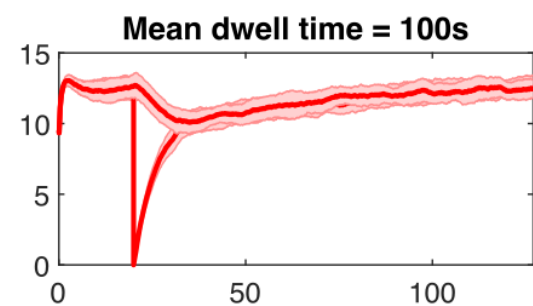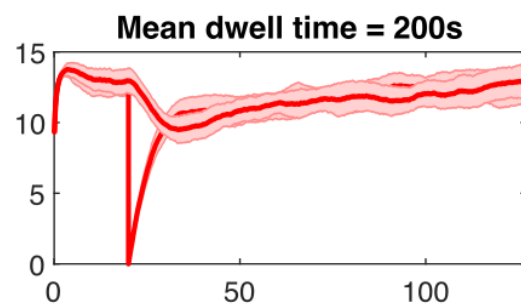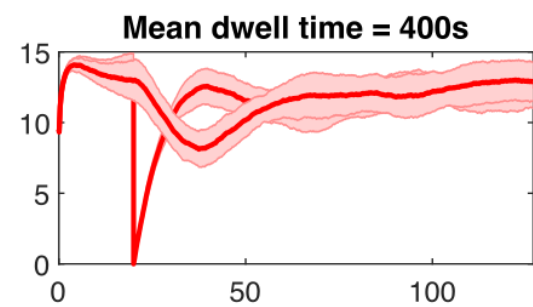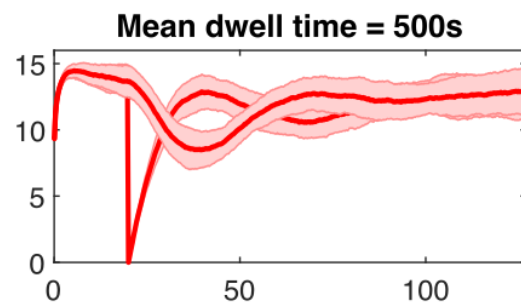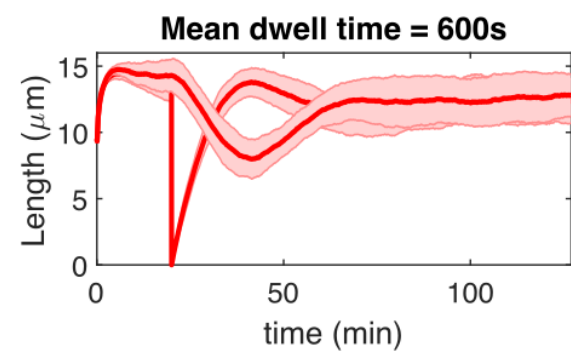

Supplement: supp [file elife-42599-supp-v1.zip]
